# Supplementary material for: Jagged-1/Notch Pathway and Key Transient Markers Involved in Biliary Fibrosis during Opisthorchis felineus Infection
Source: MDPI journal article supplement (doi:10.3390/tropicalmed7110364), 2022-11-09
Supplement: s1 [file s1]

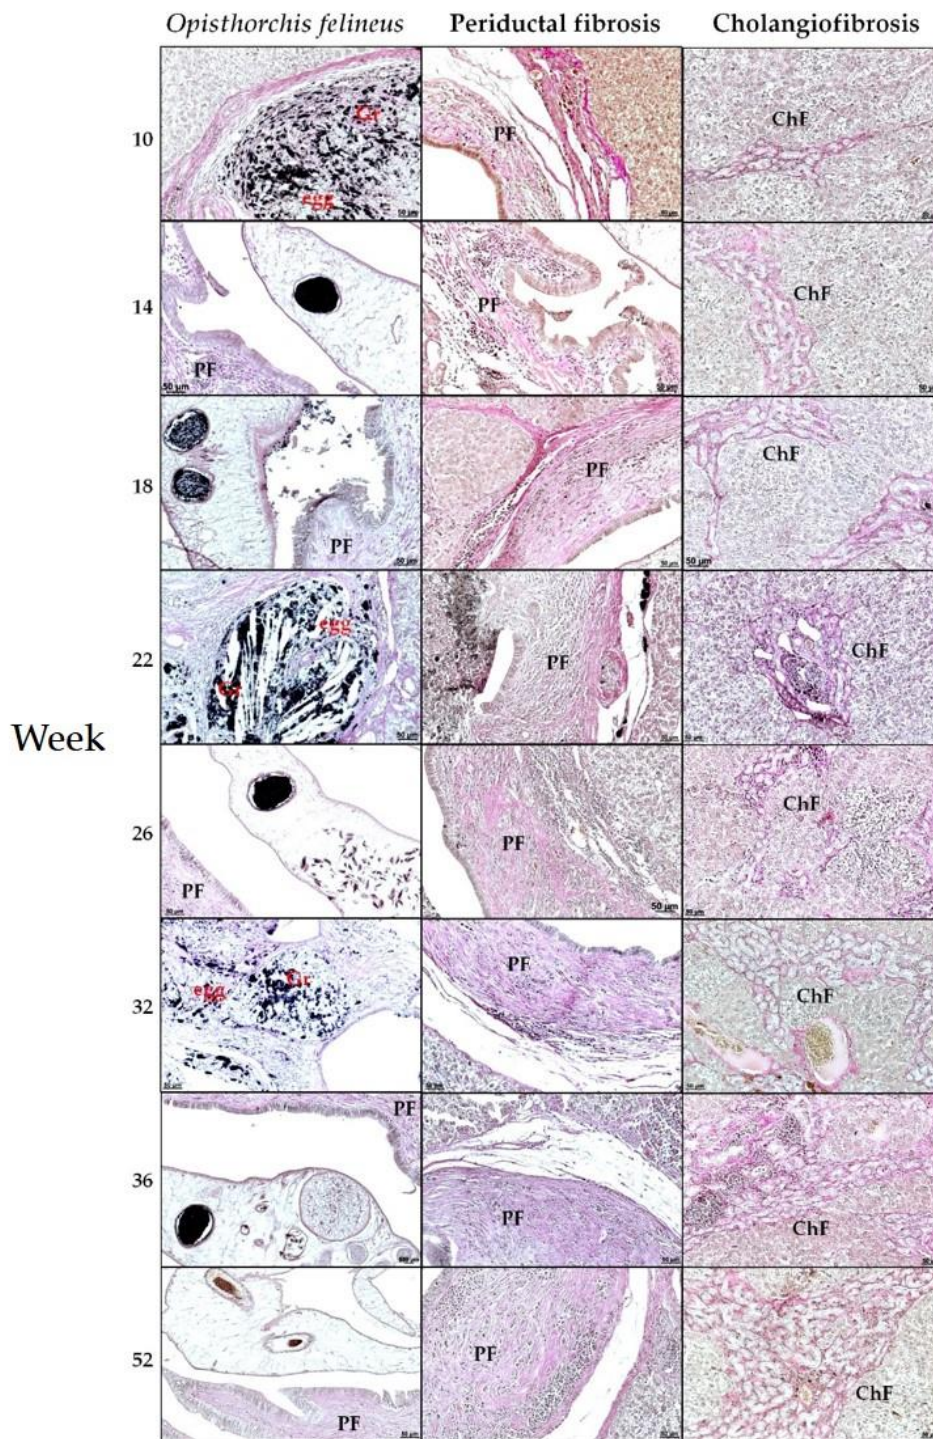

Figure S1: Histopathological changes in Syrian hamster liver, Van Gieson staining. OF – *Opisthorchis felineus*, Gr – granuloma, egg – *O. felineus* egg into granuloma, PF – periductal fibrosis, ChF – cholangiofibrosis. Magnification x200.

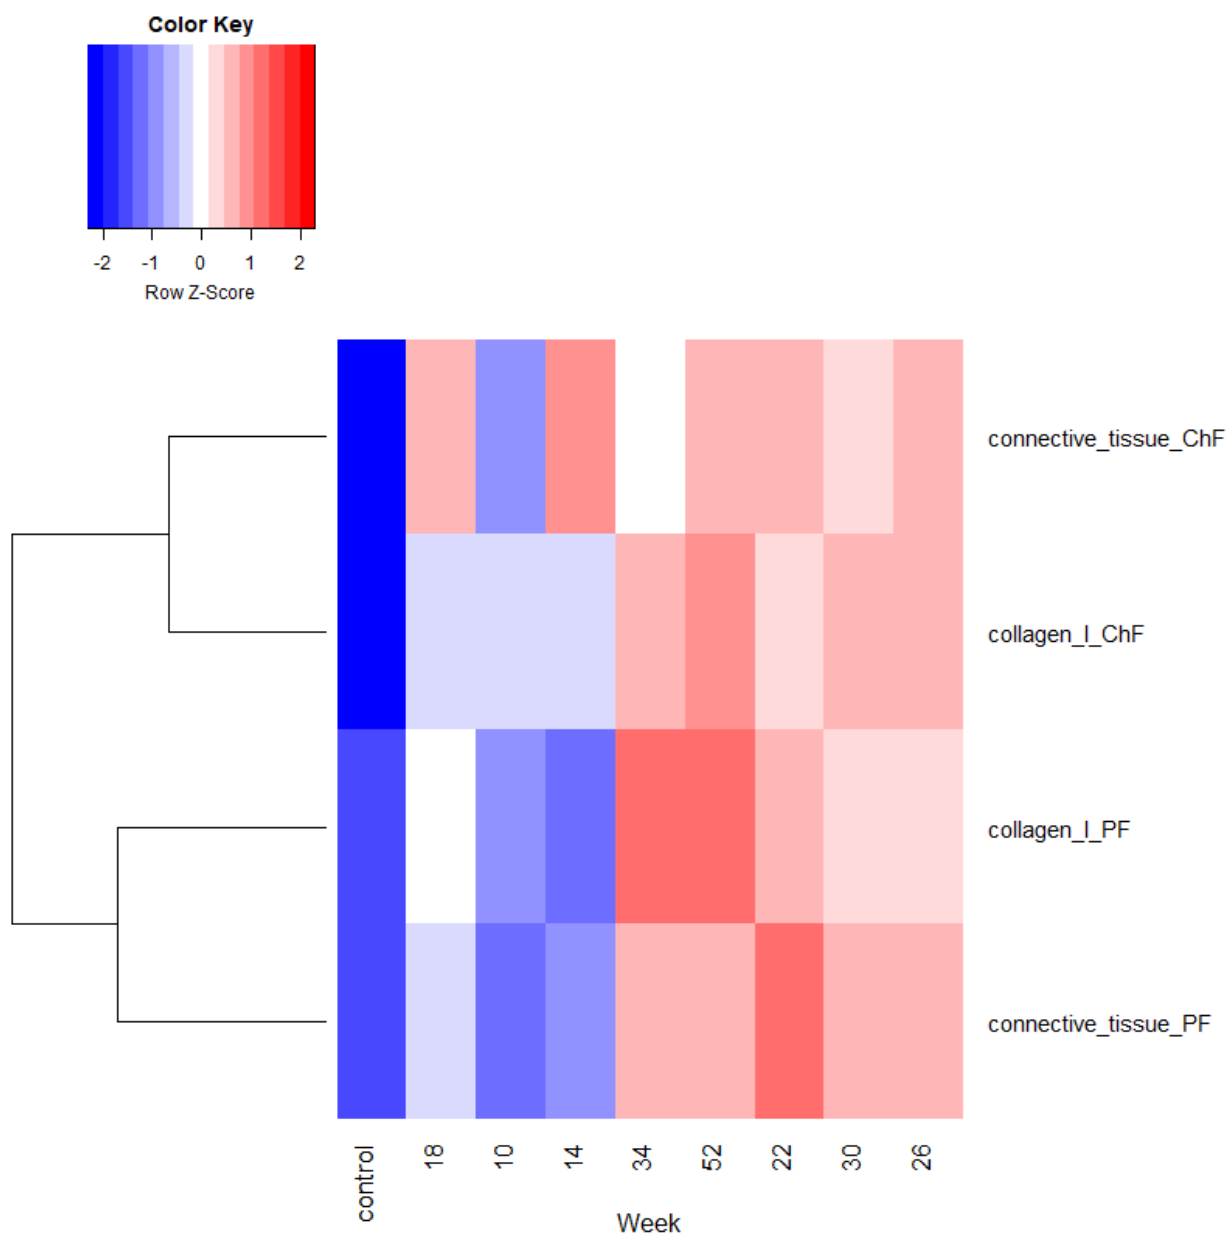

Figure S2: Clustering analysis of periductal and cholangiofibrosis with type I collagen.

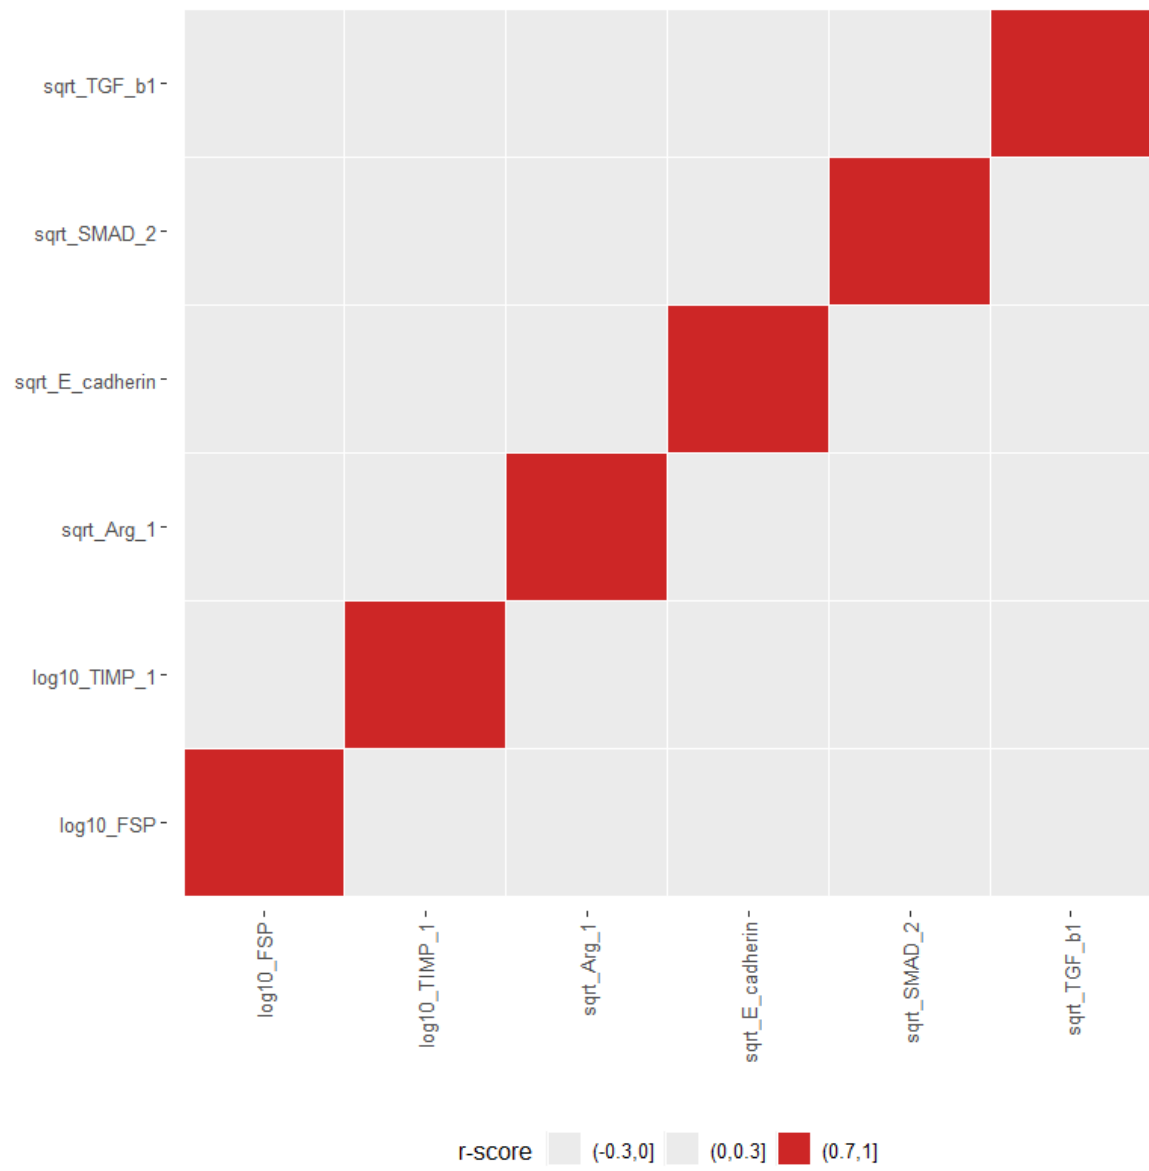

Figure S3: Calculation of parametric criterion Pearson correlation.

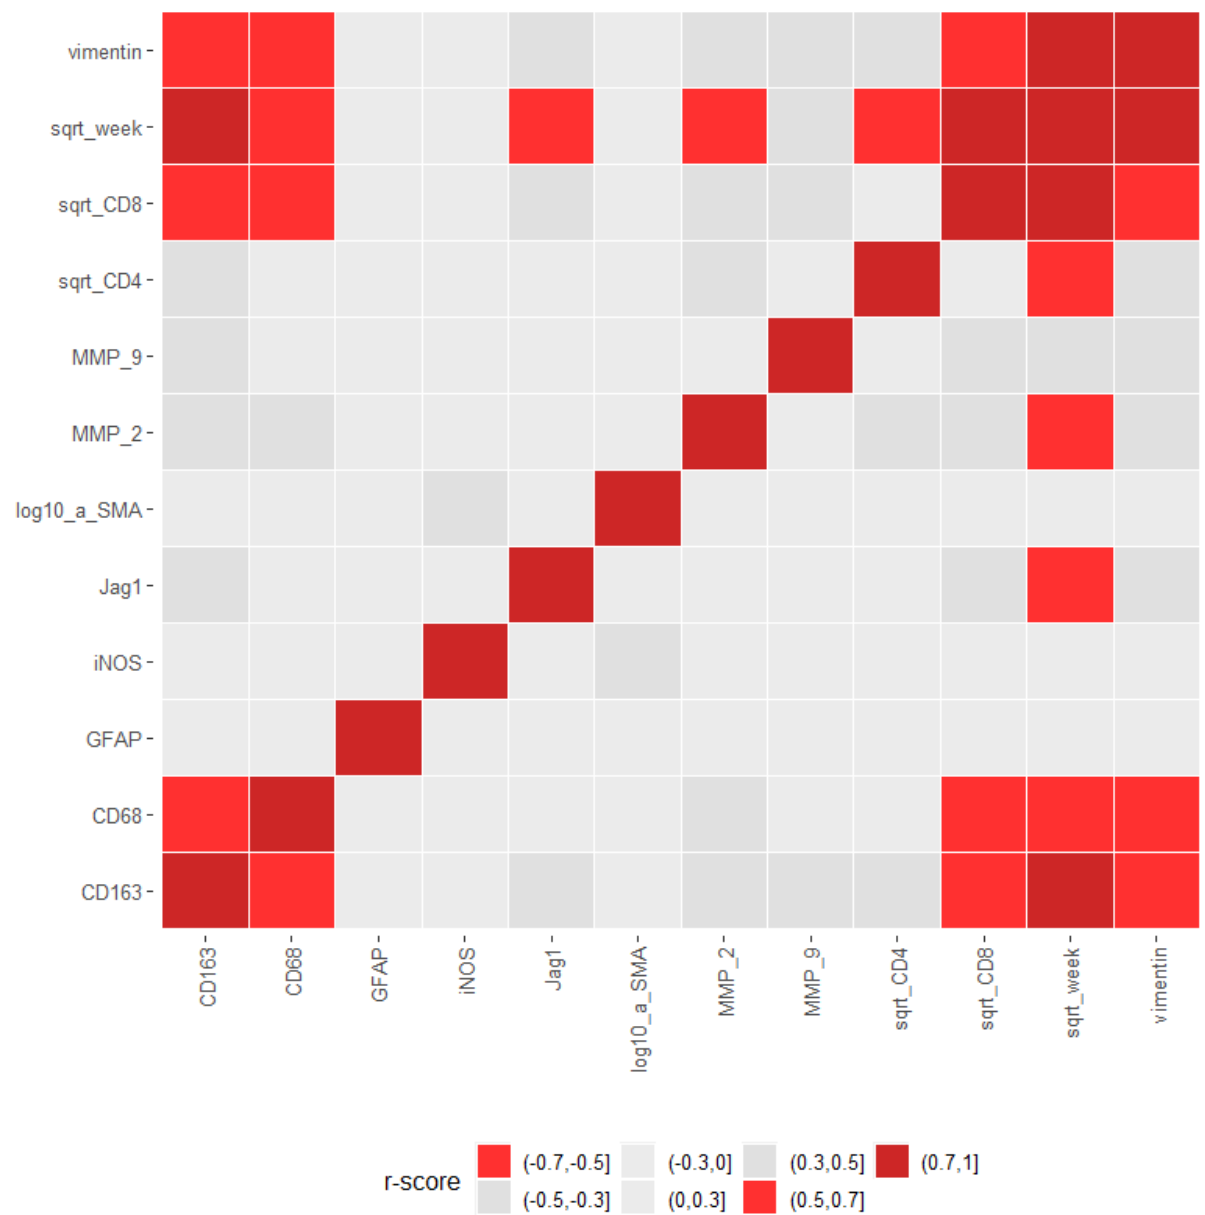

Figure S4: Calculation of non-parametric criterion Spearman correlation.
