# Supplementary material for: Jagged-1/Notch Pathway and Key Transient Markers Involved in Biliary Fibrosis during Opisthorchis felineus Infection
Source: Trop Med Infect Dis. 2022 Nov 9;7(11):364. doi: 10.3390/tropicalmed7110364 (PMC9697314; doi:10.3390/tropicalmed7110364)
Supplement: Supplementary file 1 [file tropicalmed-07-00364-s001.zip › supplementary material S1.xlsx]

## Sheet: Supplement content
Supplement content:
1. 'Table S1'	Primers and probes used for real-time PCR in this study
2. 'Table S2'	Multiple logical regression model demonstrated the greatest contribution of factors on the development of chronic periductal and cholangiofibrosis in the dynamics of infection

## Sheet: Table S1
		Table S1. Primers and probes used for real-time PCR in this study
		Name	Sequence	Length (bp)
		Acta2_F	GGATGCAGAAGGAGATCACAG	21
		Acta2_R	GGATGCAGAAGGAGATCACAG	21
		Tgfb_F	CCAACTATTGCTTCAGCTCCAC	22
		Tgfb_R	CAGGGCCAGGACCTTGCT	18
		Mmp9_F	AGGTTCGACTTGAAGACACAG	21
		Mmp9_R	TTGGTCGTGGCAGAAATAGG	20
		Fgf2_F	AAGCGGCTCTACTGCAAGAA	20
		Fgf2_R	TCTTCTGTAACACACTTAGAAGCCA	25
		Col1a1_F	TCCCTGAAATCACCTGCATAC	21
		Col1a1_R	GTGGCAAATACAGATCAAGCAG	22
		Jag1_F	TTAACGACTGTGAGAGCAACC	21
		Jag1_R	ACAAGGGTTCTGGCTACAATC	21
		Hes1_F	ATTTGCCTTCCTCATCCCC	19
		Hes1_R	GAAGGAGACACTGCGTTAGG	20
		Hey1_F	GGAAGTTGCCCGTTATCTGAG	21
		Hey_R	TGTTGAGATGTGACACCAGG	20
		Gapdh_F	GAACATCATCCCTGCATCCACT	22
		Gapdh_R	ATGCCTGCTTCACCACCTTCTT	22

## Sheet: Table S2
Table S2. Multiple logical regression model demonstrated the greatest contribution of factors on the development of chronic periductal and cholangiofibrosis in the dynamics of infection
Periductal fibrosis ~ Jag1 + MMP_9 +Jag1 : MMP_9							Cholangiofibrosis ~ Jag1 + MMP_9 +Jag1 : MMP_9
predictors	Estimate	Std. Error	t value	Pr(>|t|)			predictors	Estimate	Std. Error	t value	Pr(>|t|)
(Intercept)	-55.5175	19.1683	-2.89633	0.00469598			(Intercept)	-33.6435	12.0918	-2.78233	0.00652276
Jag1	0.677201	0.197591	3.42729	0.000906132			Jag1	0.700703	0.124646	5.62157	1.92961e-07
MMP_9	1.04772	0.246636	4.24806	5.07069e-05			MMP_9	0.738124	0.155584	4.74421	7.45412e-06
Jag1:MMP_9	-0.00753442	0.00243318	-3.09654	0.00258088			Jag1:MMP_9	-0.0068721	0.00153491	-4.47719	2.12324e-05
Multiple R-squared: 0.4236, Adjusted R-squared: 0.4052							Multiple R-squared: 0.343, Adjusted R-squared: 0.322
Periductal fibrosis ~ MMP_2 + sqrt_E_cadherin + MMP_2 : sqrt_E_cadherin							Cholangiofibrosis ~ MMP_2 + sqrt_E_cadherin + MMP_2 : sqrt_E_cadherin
predictors	Estimate	Std. Error	t value	Pr(>|t|)			predictors	Estimate	Std. Error	t value	Pr(>|t|)
(Intercept)	10.3718	32.294	0.321166	0.748797			(Intercept)	21.109	19.5548	1.07948	0.283135
MMP_2	0.406218	0.365755	1.11063	0.269561			MMP_2	0.275717	0.221473	1.24493	0.216253
sqrt_E_cadherin	4.0968	3.77682	1.08472	0.280819			sqrt_E_cadherin	1.81506	2.28695	0.793659	0.429393
MMP_2:sqrt_E_cadherin	-0.0596488	0.0420326	-1.41911	0.159175			MMP_2:sqrt_E_cadherin	-0.0271915	0.0254517	-1.06836	0.288096
Multiple R-squared: 0.081, Adjusted R-squared: 0.051							Multiple R-squared: 0.035, Adjusted R-squared: 0.004
Regression analysis key markers of periductal and cholangio- fibrosis
Periductal fibrosis ~ log10_TIMP_1							Cholangiofibrosis ~ log10_TIMP_1
predictors	Estimate	Std. Error	t value	Pr(>|t|)			predictors	Estimate	Std. Error	t value	Pr(>|t|)
(Intercept)	-41.0281	59.9283	-0.68462	0.495233			(Intercept)	-15.6126	35.2579	-0.442811	0.658898
log10_TIMP_1	37.22	28.748	1.2947	0.19853			log10_TIMP_1	26.6798	16.9135	1.57743	0.117987
Multiple R-squared: 0.017, Adjusted R-squared: 0.007							Multiple R-squared: 0.025, Adjusted R-squared: 0.015
Periductal fibrosis ~ sqrt_SMAD_2 + log10_a_SMA + sqrt_SMAD_2 : log10_a_SMA							Cholangiofibrosis ~ sqrt_SMAD_2 + log10_a_SMA + sqrt_SMAD_2 : log10_a_SMA
predictors	Estimate	Std. Error	t value	Pr(>|t|)			predictors	Estimate	Std. Error	t value	Pr(>|t|)
(Intercept)	-159.978	68.5486	-2.33379	0.0217378			(Intercept)	-92.3631	39.197	-2.35638	0.02053
sqrt_SMAD_2	23.4341	9.40969	2.49042	0.0145143			sqrt_SMAD_2	14.9731	5.38058	2.78281	0.00651394
log10_a_SMA	112.767	41.0086	2.74984	0.00715142			log10_a_SMA	78.8678	23.4492	3.36334	0.00111545
sqrt_SMAD_2:log10_a_SMA	-13.3365	5.59821	-2.38227	0.0192199			sqrt_SMAD_2:log10_a_SMA	-8.89643	3.20113	-2.77916	0.00658195
Multiple R-squared: 0.120, Adjusted R-squared: 0.092							Multiple R-squared: 0.176, Adjusted R-squared: 0.149
Periductal fibrosis ~ sqrt_TGF_b1							Cholangiofibrosis ~ sqrt_TGF_b1
predictors	Estimate	Std. Error	t value	Pr(>|t|)			predictors	Estimate	Std. Error	t value	Pr(>|t|)
(Intercept)	33.2895	7.80785	4.26359	4.70769e-05			(Intercept)	35.0046	4.58797	7.62966	1.71232e-11
sqrt_TGF_b1	0.489721	1.15764	0.423033	0.673217			sqrt_TGF_b1	0.75087	0.680242	1.10383	0.272427
Multiple R-squared: 0.002, Adjusted R-squared: -0.001							Multiple R-squared: 0.012, Adjusted R-squared: 0.002
Periductal fibrosis ~ log10_FSP + GFAP + log10_FSP : GFAP							Cholangiofibrosis ~ log10_FSP + GFAP + log10_FSP : GFAP
predictors	Estimate	Std. Error	t value	Pr(>|t|)			predictors	Estimate	Std. Error	t value	Pr(>|t|)
(Intercept)	65.3077	36.7781	1.77572	0.0790144			(Intercept)	8.37732	21.4381	0.390767	0.696853
log10_FSP	-37.0095	29.8883	-1.23826	0.218703			log10_FSP	17.2232	17.4221	0.988585	0.325404
GFAP	-1.94421	2.07753	-0.93583	0.351759			GFAP	1.34697	1.211	1.11228	0.268855
log10_FSP:GFAP	2.33802	1.68749	1.3855	0.169178			log10_FSP:GFAP	-0.629872	0.983644	-0.640346	0.523506
Multiple R-squared: 0.086, Adjusted R-squared: 0.057							Multiple R-squared: 0.110, Adjusted R-squared: 0.082
Periductal fibrosis ~ vimentin							Cholangiofibrosis ~ vimentin
predictors	Estimate	Std. Error	t value	Pr(>|t|)			predictors	Estimate	Std. Error	t value	Pr(>|t|)
(Intercept)	18.9005	3.95378	4.78036	6.3019e-06			(Intercept)	37.1163	2.57207	14.4305	8.80271e-26
vimentin	0.0903876	0.0192349	4.69915	8.71813e-06			vimentin	0.0147238	0.0125129	1.17668	0.242232
Multiple R-squared: 0.187, Adjusted R-squared: 0.178							Multiple R-squared: 0.014, Adjusted R-squared: 0.004
Multiple logical regression model demonstrated the greatest contribution of factors on the development of chronic periductal and cholangiofibrosis in the dynamics of infection
